# Reflections of Two Parallel Pathways between the Hippocampus and Neocortex in Transient Global Amnesia: A Cross-Sectional Study Using DWI and SPECT

Young Ho Park<sup>1,2</sup>, Jae-Won Jang<sup>1,2</sup>, Youngsoon Yang<sup>3</sup>, Jung Eun Kim<sup>1,2</sup>, SangYun Kim<sup>1,2\*</sup>

**1** Department of Neurology, Seoul National University College of Medicine, Seoul, Korea, **2** Clinical Neuroscience Center, Seoul National University Bundang Hospital, Seongnam, Korea, **3** Department of Neurology, Seoul Veterans Hospital, Seoul, Korea

## Abstract

**Objectives:** Two parallel pathways have been proposed between the hippocampus and neocortex. Recently, the anterior and posterior hippocampus showed distinct connectivity with different cortical areas in an fMRI study. We investigated whether the two parallel pathways could be confirmed in patients with transient global amnesia (TGA) which is a natural lesion model of a perturbation of the hippocampus. In addition, we evaluated the relationship between the location of the hippocampal lesion and various clinical variables.

**Methods:** A consecutive series of 37 patients were identified from the TGA registry database of Seoul National University Bundang Hospital. Based on the location of the diffusion-weighted imaging (DWI) lesion along the anterior-posterior axis of the hippocampus, they were divided into the following three groups: head (n = 15), body (n = 15) or tail (n = 7). To evaluate which cortical regions showed hypoperfusion according to the location of the DWI lesion, their SPECT images were compared between two groups using statistical parametric mapping. We performed hierarchical cluster analysis to group demographic and clinical variables, including the location of the DWI lesion, into clusters.

**Results:** Statistical parametric mapping analyses revealed that more anterior DWI lesions were associated with hypoperfusion of the anterior temporal and frontal areas, whereas more posterior lesions were associated with hypoperfusion of the posterior temporal, parietal, occipital and cerebellar areas. The difference was most prominent between the group of hippocampal lesions on the head and tail. Hierarchical cluster analysis demonstrated that vomiting was related to female gender and hippocampal head lesions, whereas vascular risk factors were related to male gender and hippocampal body lesions.

**Conclusions:** We confirmed the parallel pathways between the hippocampus and neocortex with DWI and SPECT images of patients with TGA. Patients with hippocampal head lesions and body lesions were clustered within different groups of clinical variables.

**Citation:** Park YH, Jang J-W, Yang Y, Kim JE, Kim S (2013) Reflections of Two Parallel Pathways between the Hippocampus and Neocortex in Transient Global Amnesia: A Cross-Sectional Study Using DWI and SPECT. PLoS ONE 8(7): e67447. doi:10.1371/journal.pone.0067447

**Editor:** Bogdan Draganski, Centre Hospitalier Universitaire Vaudois Lausanne - CHUV, UNIL, Switzerland

**Received:** January 9, 2013; **Accepted:** May 19, 2013; **Published:** July 5, 2013

**Copyright:** © 2013 Park et al. This is an open-access article distributed under the terms of the Creative Commons Attribution License, which permits unrestricted use, distribution, and reproduction in any medium, provided the original author and source are credited.

**Funding:** The authors have no support or funding to report.

**Competing Interests:** The authors have declared that no competing interests exist.

\* E-mail: neuroksy@snu.ac.kr

## Introduction

Transient global amnesia (TGA) is a syndrome of sudden-onset anterograde and retrograde amnesia which is not associated with other neurological deficits and disappears in less than 24 hours [1]. Although its exact pathogenesis is still not completely understood, hippocampal CA1 neurons are thought to be mainly involved in the pathophysiology of TGA [1]. In many patients with TGA, focal hyperintense diffusion-weighted imaging (DWI) lesions have been detected in the CA1 field of the hippocampal formation [2].

Since the hippocampal formation is connected with cortical areas [3], cortical neuronal activity might be influenced by hippocampal DWI lesions [4]. Most studies investigating regional cerebral blood flow in TGA via single photon emission computed tomography (SPECT) have noted mesiotemporal hypoperfusion

with or without the concomitant involvement of various cortical, subcortical and cerebellar structures [4–14].

With respect to the connection between the hippocampus and neocortex, two parallel pathways have been proposed [3,15,16]. Recently the anterior and posterior hippocampus showed distinct connections with different cortical areas in an fMRI study [16]. The location of hypoperfusion in TGA might be potentially determined by the site of the DWI lesions along the anterior-posterior axis of the hippocampus.

In this study, we evaluated whether the two parallel pathways between the hippocampus and neocortex could be confirmed in TGA which is a natural lesion model of a perturbation of the hippocampus. Patients with TGA within 7 days from onset were grouped based on whether the DWI lesion was located at the head, body or tail of the hippocampus [17]. To investigate which

cortical regions showed hypoperfusion according to the location of the DWI lesion, their SPECT images were compared between groups using statistical parametric mapping (SPM). In addition, we performed cluster analysis to find the relationship between the location of the DWI lesion and various clinical variables.

## Methods

This was a cross-sectional study of patients with TGA based upon a TGA registry database. A consecutive series of patients who visited Seoul National University Bundang Hospital within 7 days of symptom onset and fulfilled criteria for TGA between January 2008 and June 2011 were identified from the registry database. The diagnostic criteria for TGA were based on patient history and physical examination and included a bedside mental status examination. The criteria were: (i) presence of anterograde amnesia (e.g., asking repetitive questions or exhibiting temporal disorientation) that was witnessed by an observer, (ii) no clouding of consciousness or loss of personal identity, (iii) cognitive impairments limited to amnesia (e.g., lack of symptoms such as inability to recognize faces or common objects, difficulty thinking of common words while speaking or uncharacteristic mood change), (iv) no focal neurologic signs or epileptic features, (v) no recent history of head trauma or seizures and (vi) resolution of symptoms within 24 hours [18]. Patients who also had brain SPECT within 7 days of onset were included. We then selected patients who showed 1- to 5-mm punctate hyperintense lesions in the lateral portion of the hippocampus, probably around the CA1 field, on DWI [19]. We excluded patients who had extra-hippocampal structural lesions that caused perfusion abnormalities. Patients' demographics, clinical profiles and imaging data were obtained directly from the registry database or through medical record review. MRI and SPECT images were read by board-certified neuroradiologists and nuclear medicine physicians, respectively. A paired *t*-test was used to evaluate whether scanning timing in respect to the chronology of each individual attack was different between DWI and SPECT. We compared patients who were included and excluded with respect to demographics and clinical characteristics using Student's *t*-test for continuous variables. We used either Pearson's chi-square test or Fisher's exact test, as appropriate, for the categorical variables.

We divided the study population into the following three groups based on the site of the DWI lesion along the anterior-posterior axis: (i) hippocampal head lesion (lesions confined to the hippocampal head or concomitantly in both the hippocampal head and body), (ii) hippocampal body lesion (lesions confined to the hippocampal body) and (iii) hippocampal tail lesion (lesions confined to the hippocampal tail or concomitantly in both the hippocampal tail and body) [17]. Patients with simultaneous lesions of the hippocampal head and tail were excluded. Demographics and clinical characteristics among the groups were compared using the Fisher's exact test for categorical variables. Demographic variables were also compared using the Mann-Whitney *U* test for two groups (head and tail, head and body, body and tail) or the Kruskal-Wallis test for three groups (head, body and tail) for continuous variables.

## Imaging Parameters

MRI was usually performed within a few hours after arriving at the hospital on either a 1.5-Tesla unit (Intera; Philips Medical Systems, Best, the Netherlands) or a 3-Tesla unit (Intera Achieva; Philips, Best, the Netherlands) with a sensitivity encoding (SENSE) head coil. The MRI protocol included DWI, T1- and T2-weighted imaging; fluid-attenuated inversion recovery imaging; convention-

al gradient-echo imaging in the transverse plane; T1-weighted imaging in the sagittal plane; 3D time-of-flight angiography of the intracranial region; and contrast enhanced angiography of the neck region [19]. DWI was performed again at day 3 post-onset with the same imaging parameters. Single-shot spin-echo echoplanar imaging was used for DWI using the following parameters: matrix, 128×128 interpolated to 256×256; field of view, 220 mm; repetition time, 9,400 ms for 1.5 Tesla and 5,000 ms for 3 Tesla; echo time, 66 ms for 1.5 Tesla and 59 ms for 3 Tesla; SENSE factor, 2; number of acquisitions, 4; *b* value, 2,000 s/mm<sup>2</sup>; and section thickness, 3 mm.

SPECT images were obtained using a triple-head gamma camera (Trionix Triad; Trionix Research Laboratory, Inc., Twinsburg, OH) equipped with a low-energy, fan-beam collimator. Patients were instructed to close their eyes in a dimly lit room with minimal background noise. Scanning was initiated 10 minutes after an intravenous injection of 15 mCi of Tc-99m-ethylcysteine dimer. Data were acquired in a 128×128 matrix with a voxel size of 1.78×1.78×1.78 mm and then reconstructed by filtered back-projection using a Butterworth filter (cutoff frequency 0.6 cycle per cm, order 8) to reduce statistical noise. We also performed correction for tissue attenuation.

## SPM Analysis of Regional Perfusion

SPECT images were analyzed using SPM5 (Institute of Neurology, University College London, London, UK) [20], which was implemented using Matlab 7.8 (The MathWorks Inc., Natick, MA). The mean voxel intensity across all slices of the imaging volume was calculated. Each voxel was then thresholded at 80% of the mean intensity to eliminate background noise and partial volume effects at the edge of the brain. Each SPECT scan was then spatially normalized to the SPECT template provided by SPM5 using an affine geometric transformation. These images were smoothed using an isotropic Gaussian kernel of 16 mm full-width at half maximum. Then, a proportional scaling was applied to remove the effect of differences in global activity. After normalization and smoothing, statistical comparisons between two groups based on the site of the DWI lesion (head vs. tail, tail vs. head, head vs. body, body vs. head, body vs. tail, tail vs. body, left vs. right, right vs. left) were performed on a voxel-by-voxel basis using *t* statistics to generate SPM (*t*) maps. We investigated hypoperfusion areas at a threshold of  $P < 0.005$  (uncorrected) and an extent threshold of 100 voxels. For purposes of visualization, the significant voxels were projected onto the ch2better template included with MRIcron (<http://www.mccauslandcenter.sc.edu/micro/mricron/>).

## Classification of Patients with TGA using Multivariate Analysis

Patients with TGA can be classified into groups based upon heterogeneities in pathophysiology [21]. To cluster demographic and clinical variables, including the location of the DWI lesion, we carried out a two-stage analysis procedure on the data by means of multiple factorial analysis (MFA) and hierarchical cluster analysis (HCA) [22,23]. Because HCA is an exploratory method, the selection of the variables for the clustering classification is a critical problem [21]. We tried to resolve this problem by preceding HCA with MFA to select only pertinent variables for inclusion in HCA.

MFA distinguishes variables that explain the main part of the total variance [23]. It aims to reduce dimensionality with the least possible loss of information. We used non-linear optimal scaling transformation for our MFA [24]. We then performed HCA on the resulting variables. HCA aims to sort a set of objects into groups such that the objects in the same group are more similar to

each other than to the objects in other groups [22]. We used Yule's  $Q$ , a summary measure of pairwise association, based on the conditional odds ratio [25]. For the measure of distance between two groups, we used the unweighted pair group method with arithmetic mean [26]. One patient who had only imaging data without a detailed medical record available for review was excluded from MFA and HCA.

All statistical analyses were performed using the PASW statistical software version 19.0 (IBM Corp., Somers, NY), except for the SPM analysis. Because all data were analyzed anonymously, a waiver of informed consent was obtained from the Seoul National University Bundang Hospital Institutional Review Board, which approved this study.

## Results

We identified 88 TGA patients who arrived at the hospital within 7 days of symptom onset. Fifty-seven patients also had brain SPECT within 7 days of onset. Among these 57 patients, 41 patients had relevant hippocampal lesions on DWI during the study period. Four patients were excluded for the following reasons: old infarction in the temporal lobe with stenosis of the posterior cerebral artery ( $n = 1$ ) and concomitant lesions of the hippocampal head and tail ( $n = 3$ ). The study population consisted of the remaining 37 patients (Table S1). There was no hyperperfusion on visual rating of SPECT images. Time of onset to SPECT was significantly longer than time of onset to DWI with a mean difference of 13.36 hours ( $P = 0.031$ ). The included patients had a longer duration of TGA and a higher incidence of dizziness compared with the excluded patients (Table S2).

The baseline characteristics of the study population were summarized according to the site of the DWI lesion along the anterior-posterior axis of the hippocampus (Table 1). Respective examples of hippocampal head, body and tail lesion on DWI were demonstrated (Figure 1). In paired-group comparisons, the following variables were significantly different at  $P < 0.05$ : the frequency of vomiting as a precipitating factor and nausea as an associated symptom in patients with hippocampal head lesions was higher than in patients with body lesions; the global amnesia lasted longer in patients with tail lesions than in patients with head lesions.

Perfusion was decreased in the inferior frontal and anterior temporal areas and the cingulate gyrus of patients with hippocampal head lesions compared with patients with tail lesions (Figure 2A, Table 2). Compared with patients with head lesions, patients with tail lesions showed perfusion deficits in the parieto-occipital and cerebellar areas (Figure 2B, Table 2). Blood flow in patients with head lesions was reduced in the middle frontal areas relative to patients with body lesions (Figure 2C, Table 2). Patients with body lesions had hypoperfusion in the cerebellar area compared with patients with head lesions (Figure 2D, Table 2). Perfusion was decreased in the frontal and anterior temporal areas and the postcentral gyrus in patients with body lesions compared with patients with tail lesions (Figure 2E, Table 2). Compared with patients with body lesions, patients with tail lesions showed hypoperfusion in the parieto-occipital and posterior temporal areas and in the middle frontal gyrus (Figure 2F, Table 2).

Patients with left hippocampal lesions showed perfusion deficit in the bilateral parietal areas relative to patients with right hippocampal lesions (Figure S1). Perfusion was decreased in the bilateral frontotemporal areas of patients with right hippocampal lesions compared with patients with left hippocampal lesions (Figure S1). Cerebral hypoperfusion was not lateralized according to the side of the hippocampal lesions.

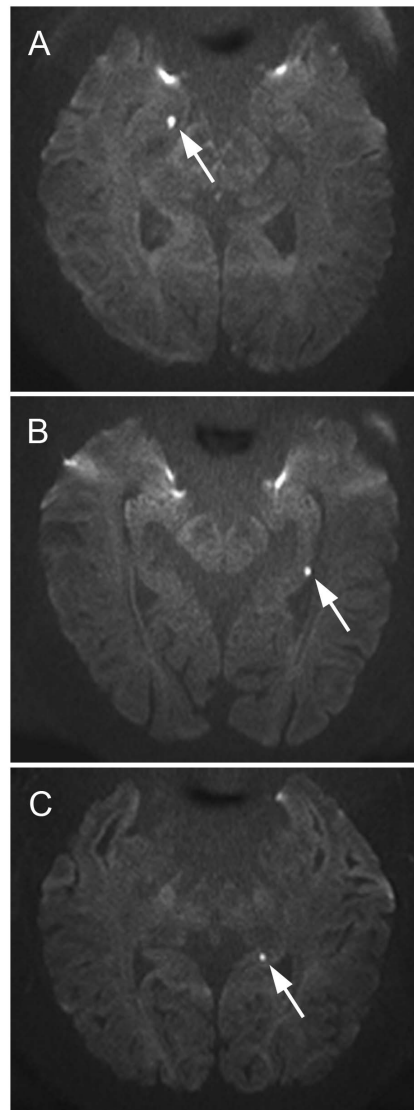

**Figure 1. Examples of hippocampal head, body and tail lesion on diffusion-weighted imaging.** The punctuate hyperintense lesions in the hippocampal head (A), body (B) and tail (C) were indicated with white arrows on axial diffusion-weighted imaging. doi:10.1371/journal.pone.0067447.g001

To classify the clinical features associated with the site of the DWI lesion, the following variables were collected initially: location of the DWI lesion (head, body, tail), gender, age ( $< 60$ ,  $\geq 60$  years), precipitating events (physical stress, emotional stress, vomiting), associated symptoms (headache, dizziness, nausea and none) and risk factors (hypertension, diabetes, hyperlipidemia, migraine and vascular risk factors). Vascular risk factors were defined to include hypertension, diabetes, hyperlipidemia, heart disease and smoking. Two dimensions explained 34.05% of the total variance in MFA. The fit of the model was evaluated with Cronbach's alpha coefficient (0.729) and was acceptable [27]. The variables with the highest coefficient loadings (higher than 0.2) in at least one of the two dimensions were the location of the DWI lesion (head and body), gender, age, precipitation by vomiting, associated symptoms (dizziness, nausea and none) and vascular risk factors (Table S3). These variables were then included in HCA. The dendrogram showed four principal clusters (Figure 3).

**Table 1.** Comparison of the baseline characteristics based on the site of DWI lesion.

|                                                           | Hippocampal head lesion (n = 15) | Hippocampal body lesion <sup>a</sup> (n = 15) | Hippocampal tail lesion (n = 7) | P value <sup>b</sup> |
|-----------------------------------------------------------|----------------------------------|-----------------------------------------------|---------------------------------|----------------------|
| <b>Age in years, median (IQR)</b>                         | 59 (52–66)                       | 62 (56–66)                                    | 60 (57–63)                      | 0.654                |
| <b>Men</b>                                                | 3 (20.0%)                        | 6 (40.0%)                                     | 2 (28.6%)                       | 0.649                |
| <b>Precipitating factor</b>                               |                                  |                                               |                                 |                      |
| <b>Physical stress</b>                                    | 6 (40.0%)                        | 7 (50.0%)                                     | 4 (57.1%)                       | 0.753                |
| <b>Emotional stress</b>                                   | 6 (40.0%)                        | 8 (57.1%)                                     | 3 (42.9%)                       | 0.683                |
| <b>Vomiting</b>                                           | 5 (33.3%)                        | 0                                             | 0                               | 0.016                |
| <b>Duration of TGA in hours, median (IQR)<sup>c</sup></b> | 5 (3–7)                          | 6.5 (5.75–10.5)                               | 7 (6.5–13)                      | 0.079                |
| <b>Associated symptoms</b>                                |                                  |                                               |                                 |                      |
| <b>Headache</b>                                           | 5 (33.3%)                        | 3 (21.4%)                                     | 4 (57.1%)                       | 0.277                |
| <b>Dizziness</b>                                          | 3 (20.0%)                        | 1 (7.1%)                                      | 0                               | 0.501                |
| <b>Nausea</b>                                             | 5 (33.3%)                        | 0                                             | 0                               | 0.016                |
| <b>None</b>                                               | 7 (46.7%)                        | 10 (71.4%)                                    | 3 (42.9%)                       | 0.375                |
| <b>Hypertension</b>                                       | 4 (26.7%)                        | 6 (42.9%)                                     | 1 (14.3%)                       | 0.411                |
| <b>Diabetes</b>                                           | 1 (6.7%)                         | 2 (14.3%)                                     | 0                               | 0.588                |
| <b>Hyperlipidemia</b>                                     | 3 (20%)                          | 6 (42.9%)                                     | 4 (57.1%)                       | 0.186                |
| <b>Migraine</b>                                           | 0                                | 3 (21.4%)                                     | 0                               | 0.141                |
| <b>Laterality of DWI lesion</b>                           |                                  |                                               |                                 |                      |
| <b>Left</b>                                               | 4 (26.7%)                        | 6 (40.0%)                                     | 1 (14.3%)                       | 0.159                |
| <b>Right</b>                                              | 6 (40.0%)                        | 8 (53.3%)                                     | 2 (28.6%)                       |                      |
| <b>Bilateral</b>                                          | 5 (33.3%)                        | 1 (6.7%)                                      | 4 (57.1%)                       |                      |
| <b>Time of onset to DWI in hours, median (IQR)</b>        | 49 (7–72)                        | 50 (10–72)                                    | 71 (9.5–72)                     | 0.937                |
| <b>Time of onset to SPECT in hours, median (IQR)</b>      | 48 (29–96)                       | 45 (28–68)                                    | 49 (40–70)                      | 0.902                |

Values are number (%) unless indicated.

Abbreviations: DWI = diffusion-weighted imaging; IQR = interquartile range; TGA = transient global amnesia.

<sup>a</sup>For one patient from group with hippocampal body lesions, only data concerning age, gender, laterality of DWI lesion, time of onset to DWI and time of onset to SPECT were available.

<sup>b</sup>P values were obtained using the Kruskal-Wallis test or the Fisher's exact test as appropriate.

<sup>c</sup>When patients were able to explain the reasons for their hospitalizations and to form new memories, we considered their episode of TGA to be over.

doi:10.1371/journal.pone.0067447.t001

Patients with the hippocampal head lesions were grouped together with women, symptoms of nausea and dizziness and precipitation by vomiting. Patients with the hippocampal body lesions were grouped together with men and vascular risk factors.

## Discussion

Tract-tracing studies in rodents and monkeys have revealed the two parallel pathways through which unimodal and multimodal inputs reach the hippocampal formation [3]. Information from the anterior association regions, such as the medial and orbital frontal cortices, is segregated into the perirhinal cortex (PRC) and then into the lateral entorhinal area (LEA), whereas information from the posterior associational regions, such as the retrosplenial cortex, is segregated into the parahippocampal cortex (PHC) and then into the medial entorhinal area (MEA) [3,28,29]. The LEA is interconnected with the ventral (analogous to anterior hippocampal formation in primates) CA1 field and the subiculum, and the MEA is interconnected with the dorsal (analogous to posterior hippocampal formation in primates) CA1 field and the subiculum in rats [16,30].

In humans, an fMRI study has shown that the PRC is preferentially connected with the anterior hippocampus, whereas the PHC is preferentially connected with the posterior hippocampus [16]. This anterior-posterior connectivity gradient is more

robust in the CA1 field, where the DWI lesions have been detected in TGA, and in the subiculum than in the CA2/CA3/dentate gyrus region. The PRC shows preferential connectivity with an anterior temporal and frontal cortical network, and the PHC shows preferential connectivity with a posterior medial temporal, parietal, and occipital network [16].

In the current study, we compared the locations of perfusion deficits based on the site of the hippocampal lesion along the anterior-posterior axis in patients with TGA. An SPM analysis revealed that more anterior DWI lesions were associated with hypoperfusion of the frontal and anterior temporal areas on SPECT, whereas more posterior lesions were associated with hypoperfusion of the parietal, posterior temporal, occipital and cerebellar areas. These differences were most prominent between the two groups of patients with lesion on the head and tail of the hippocampus. Our results mirrored the previously reported parallel pathways between the human hippocampal formation and the neocortex [16].

In our patients, both of more left DWI lesions and more right DWI lesions were not associated with hypoperfusion of the lateralized region, but associated with hypoperfusion of the bilateral cortical areas. A previous fMRI study also showed that each hemispheric seed of the PRC and PHC was functionally correlated not only with the ipsilateral cortical areas, but also with the contralateral cortical areas [16].

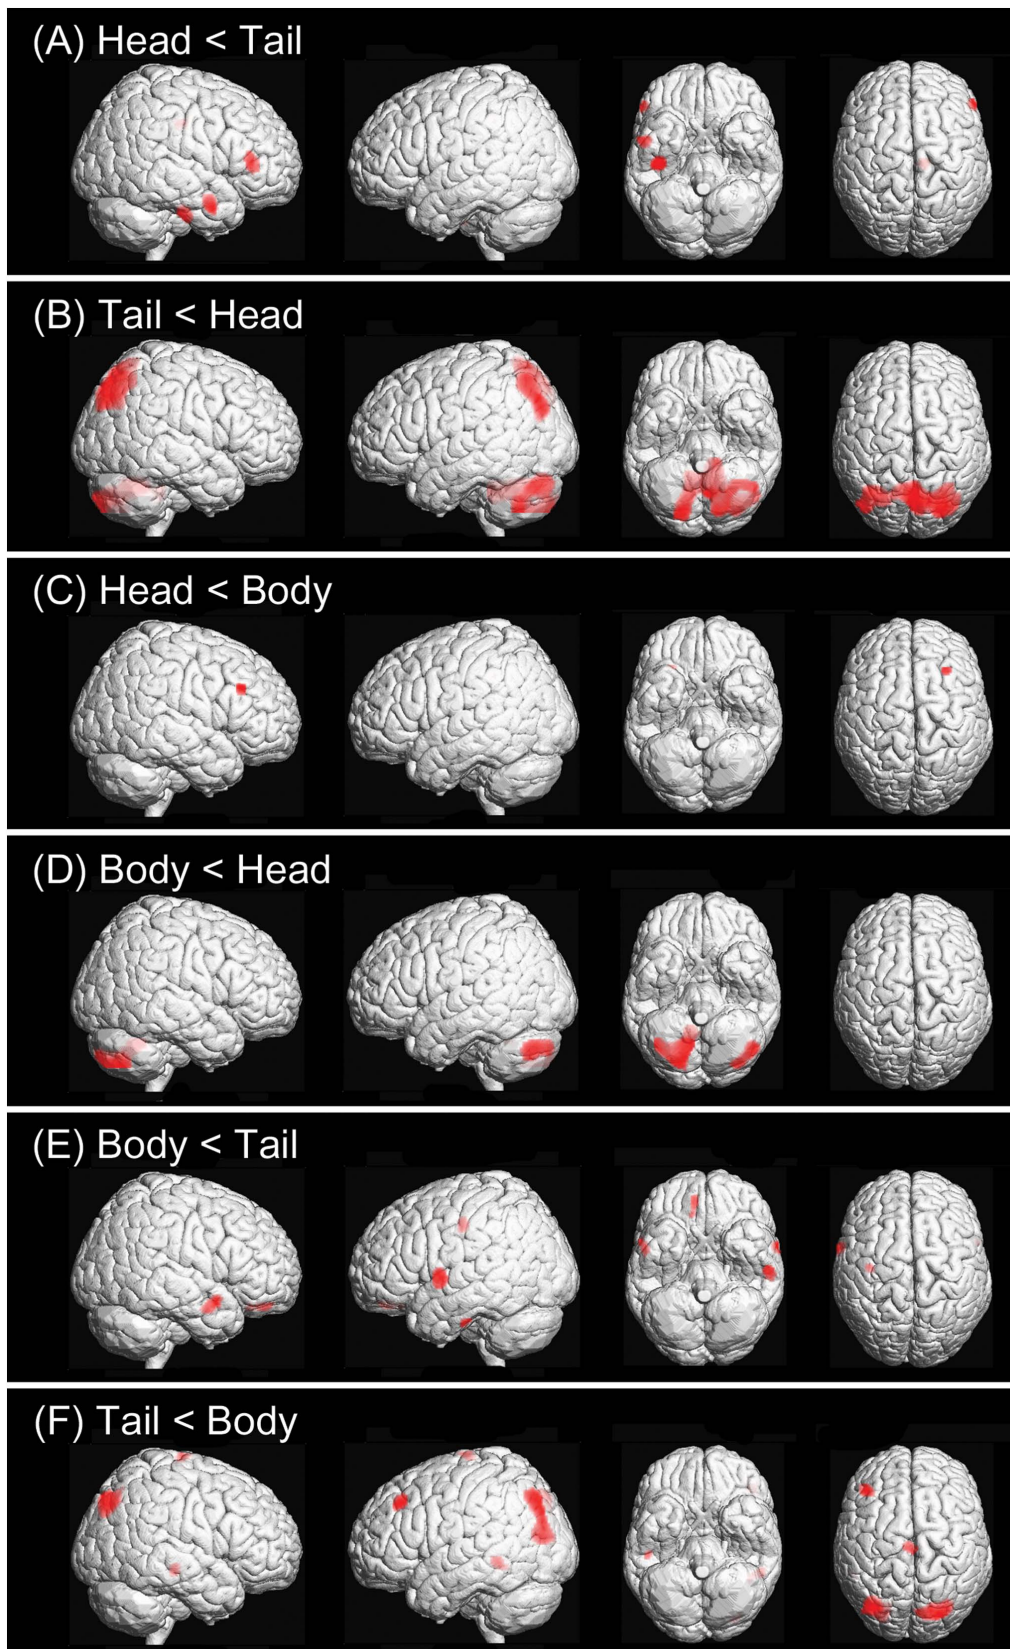

**Figure 2. Areas of hyperperfusion in relation to the longitudinal location of the hippocampal lesion.** Perfusion deficits in patients with hippocampal lesions on head vs. tail (A), tail vs. head (B), head vs. body (C), body vs. head (D), body vs. tail (E), and tail vs. body (F) were shown. The hyperperfusion areas (red color) were displayed on rendering images at a threshold of  $P < 0.005$  uncorrected,  $k = 100$ . doi:10.1371/journal.pone.0067447.g002

**Table 2.** Regions of perfusion deficit based on the site of hippocampal lesion along the anterior-posterior axis ( $P < 0.005$ , uncorrected,  $k = 100$ ).

| Variables | Regions                      | BA  | Stereotaxic coordinates |     |     | T value | Cluster size |
|-----------|------------------------------|-----|-------------------------|-----|-----|---------|--------------|
|           |                              |     | x                       | y   | z   |         |              |
| Head<Tail | Rt. fusiform gyrus           | 20  | -42                     | -18 | -30 | 4.52    | 435          |
|           | Rt. middle temporal gyrus    | 21  | -54                     | 2   | -24 | 3.26    | 320          |
|           | Rt. inferior frontal gyrus   | 45  | -58                     | 34  | 14  | 3.20    | 188          |
|           | Rt. middle cingulate gyrus   | 23  | -12                     | -20 | 40  | 3.05    | 144          |
| Tail<Head | Rt. Precuneus                | 7   | -4                      | -66 | 62  | 5.61    | 5,089        |
|           | Rt. superior occipital gyrus | 7   | -28                     | -76 | 44  | 4.75    |              |
|           | Lt. superior parietal gyrus  | 7   | 32                      | -64 | 52  | 4.50    |              |
|           | Lt. cerebellar uvula         | n/a | 6                       | -54 | -32 | 4.97    | 4,169        |
|           | Lt. cerebellar uvula         | n/a | 12                      | -44 | -36 | 4.87    |              |
|           | Cerebellar vermis            | n/a | -2                      | -54 | -30 | 4.47    |              |
| Head<Body | Rt. middle frontal gyrus     | 46  | -30                     | 28  | 32  | 3.33    | 105          |
| Body<Head | Lt. crus cerebelli           | n/a | 46                      | -68 | -38 | 3.76    | 318          |
|           | Lt. crus cerebelli           | n/a | 35                      | -80 | -34 | 3.31    |              |
|           | Lt. crus cerebelli           | n/a | 25                      | -82 | -42 | 2.80    |              |
|           | Rt. cerebellar uvula         | n/a | -10                     | -54 | -32 | 3.74    | 816          |
|           | Rt. cerebellar pyramis       | n/a | -15                     | -58 | -48 | 3.54    |              |
|           | Rt. cerebellar pyramis       | n/a | -40                     | -55 | -50 | 3.24    |              |
| Body<Tail | Lt. Rolandic operculum       | 48  | 68                      | 4   | 2   | 4.34    | 186          |
|           | Lt. postcentral gyrus        | 6   | 38                      | -14 | 42  | 3.86    | 202          |
|           | Lt. inferior temporal gyrus  | 58  | 58                      | -18 | -36 | 3.76    | 104          |
|           | Rt. superior frontal gyrus   | 20  | -12                     | 48  | -20 | 3.74    | 409          |
|           | Rt. rectus gyrus             | 11  | -14                     | 32  | -20 | 2.98    |              |
|           | Rt. middle temporal gyrus    | 21  | -54                     | 0   | -22 | 3.30    | 144          |
|           | Rt. temporal pole            | 38  | -50                     | 10  | -14 | 3.12    |              |
| Tail<Body | Lt. angular gyrus            | 7   | 36                      | -70 | 44  | 4.78    | 1,386        |
|           | Lt. middle occipital gyrus   | 19  | 28                      | -75 | 15  | 4.59    |              |
|           | Lt. middle occipital gyrus   | 19  | 38                      | -75 | 30  | 3.21    |              |
|           | Rt. superior occipital gyrus | 19  | -22                     | -78 | 40  | 4.55    | 829          |
|           | Lt. middle frontal gyrus     | 46  | 46                      | 36  | 40  | 3.89    | 177          |
|           | Rt. middle temporal gyrus    | 20  | -52                     | -26 | -10 | 3.53    | 117          |
|           | Lt. middle temporal gyrus    | 21  | 52                      | -42 | -4  | 3.32    | 202          |
|           | Lt. paracentral lobule       | 6   | 4                       | -16 | 80  | 3.22    | 147          |

Abbreviations: DWI = diffusion-weighted imaging; BA = Brodmann area; n/a = not available.

doi:10.1371/journal.pone.0067447.t002

Evidence for a functional differentiation between the anterior and posterior hippocampus has been suggested, but the topic is still controversial [31,32]. It has been shown that the anterior hippocampus was related to episodic memory encoding, whereas the posterior hippocampus was associated with episodic memory retrieval [31]. However, consistent differences in mnemonic processes have not been reported [32].

Our HCA results revealed prototypical groups, reflecting the possibility of different pathophysiological mechanisms. Precipitation by vomiting was related to female gender and hippocampal head lesion, whereas vascular risk factors were related to male gender and hippocampal body lesions. It was previously suggested that the etiology of TGA could be an ischemic event due to arterial thromboembolism in patients with vascular risk factors or due to venous ischemia in patients with Valsalva-like activities before

symptom onset [33]. The argument for the existence of two different mechanisms was supported by the finding that TGA patients with jugular vein valve incompetence showed a higher frequency of Valsalva-like maneuvers as precipitating factors and a lower frequency of vascular comorbidities than those in TGA patients without jugular vein valve incompetence [34].

These findings may be explained by structural characteristics of the hippocampal vasculature. First, the middle and the posterior hippocampal arteries, which supply the hippocampal body and tail, occasionally form a continuous arterial arcade [17]. The arcade and its branches arising at right angles may be related to the particular vulnerability of hippocampal tissue to hypoperfusion due to a sudden fall in blood pressure [17,35]. Hence, the body and tail of the hippocampus may be more prone to ischemic injury in conditions with vascular risk factors. Second, venous flow in the

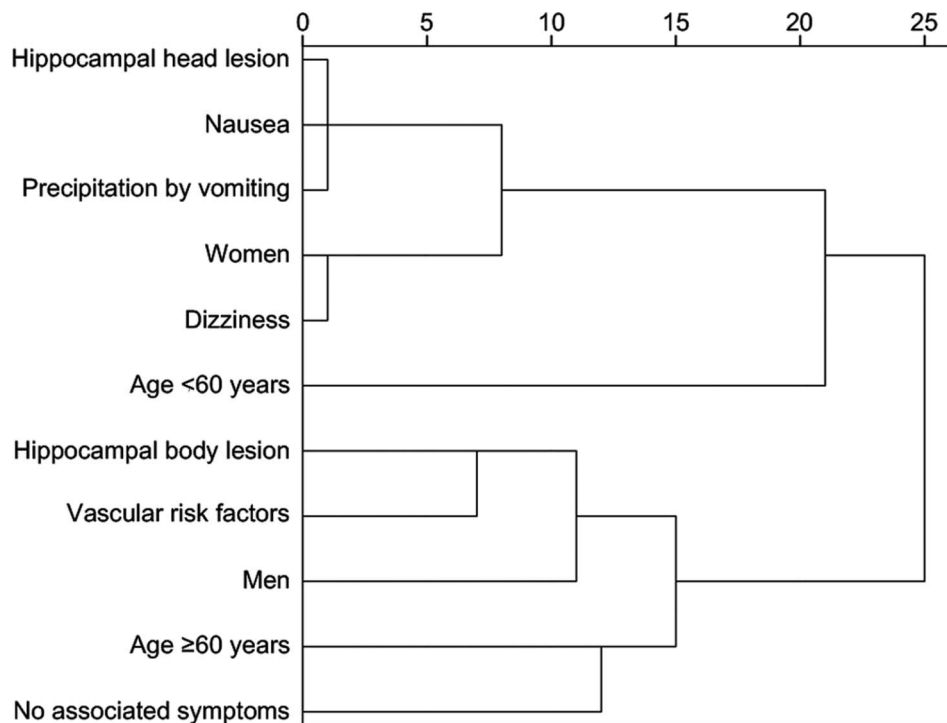

**Figure 3. Dendrogram based on the hierarchical cluster analysis.** Four principal clusters were observed: (i) women with symptoms of nausea and dizziness, patients with hippocampal head lesions, and patients who were induced by vomiting; (ii) patients aged <60 years; (iii) men with vascular risk factors and patients with hippocampal body lesions; and (iv) patients aged  $\geq 60$  years and patients without associated symptoms. doi:10.1371/journal.pone.0067447.g003

hippocampal head runs only into the inferior ventricular vein, whereas the flow in the hippocampal body and tail runs into both the inferior ventricular vein and the medial atrial vein via the longitudinal superficial venous arches [17]. Therefore, the head of the hippocampus may be more susceptible to venous congestion due to the limited outflow tracts available.

Although most patients with TGA showed regional hypoperfusion [4–14], in a few patients in whom SPECT was performed during or immediately after the episode of TGA, there was transient hyperperfusion of the medial temporal or occipitocerebellar areas [10,36,37]. This discrepancy between the results of previous SPECT studies may be due to different timings of the SPECT scans with respect to the chronology of each individual attack [37]. In our study, all patients were scanned after their recovery from amnesia and the median duration of time of onset to SPECT was 48 hours. Transient hyperperfusion, on the other hand, indicates that migraine-related mechanisms or epileptic phenomena might be involved in the pathogenesis of TGA in some patients [37].

Several limitations should be noted regarding this research. First, detailed neuropsychological assessments were unavailable and, therefore, were not included in the analysis. The pathophysiologic mechanisms responsible for the phenomenon of TGA could be elucidated more clearly by evaluating whether neuropsychological profiles are correlated with the location of regional hypoperfusion. Second, we could not perform SPM comparisons between TGA patients and normal controls because we did not have normal SPECT data available for use. The actual extent of hypoperfusion caused by TGA could be better evaluated by comparisons with normal controls rather than by comparisons between groups with hippocampal lesions in different sites. Third, there was a time gap between MRI and SPECT scanning in our

retrospective study. Hippocampal DWI lesions were already detectable in the acute phase of the TGA, were most prominent 3 days after onset and completely diminished 10–14 days after onset [2,19]. Regional hypoperfusion on SPECT in the acute phase of the TGA was gradually resolved during the following days and was normalized 15 days after onset [7,9,12]. In our study, a few days after TGA attack the DWI lesions still reflect the initial phase of TGA. In contrast, hypoperfusion on SPECT might be slightly diminished compared to the amount of hypoperfusion during the attack. Fourth, the significance levels were not corrected for multiple comparisons in SPM due to the small sample size. To reduce the false positive identification rate, we combined a two-sample *t*-test with a cluster filter of 100 voxels [38]. Fifth, there is the possibility of selection bias because the included patients had a longer duration of TGA and a higher rate of dizziness. Finally, this is a single-center study, which limits the generalizability of the study results.

In this study, we confirmed differential connectivity of the hippocampus with the neocortex along the anterior-posterior axis with DWI and SPECT images of patients with TGA. Understanding of this connectivity dissociation may help us grasp the pathophysiology of other neurological disorders that affect both the hippocampus and the neocortex, such as Alzheimer's disease.

### Supporting Information

**Figure S1** Areas of hypoperfusion in relation to the laterality of the hippocampal lesion. (PDF)

**Table S1** Clinical characteristics of the patients. (DOC)

**Table S2** Comparison of baseline characteristics between the included and excluded patients. (DOC)

**Table S3** Coefficient loadings of variables for each dimension in MFA (multiple factorial analysis). (DOC)

## Acknowledgments

We would like to acknowledge the help of Seyun Kim of the Department of Electrical Engineering and Computer Science at Seoul National University, who provided technical assistance, and Soyeon Ahn of the Medical Research Collaborating Center at Seoul National University Bundang Hospital, who provided statistical assistance.

Conceived and designed the experiments: YHP. Performed the experiments: JWJ YY. Analyzed the data: YHP JWJ YY. Wrote the paper: YHP JEK SYK. Made critical revisions to the manuscript and intellectual content: JEK SYK.

## Author Contributions

Conceived and designed the experiments: YHP. Performed the experiments: JWJ YY. Analyzed the data: YHP JWJ YY. Wrote the paper: YHP JEK SYK. Made critical revisions to the manuscript and intellectual content: JEK SYK.

## References

- Bartsch T, Deuschl G (2010) Transient global amnesia: functional anatomy and clinical implications. *Lancet Neurol* 9: 205–214.
- Bartsch T, Alfke K, Stingle R, Rohr A, Freitag-Wolf S, et al. (2006) Selective affection of hippocampal CA-1 neurons in patients with transient global amnesia without long-term sequelae. *Brain* 129: 2874–2884.
- Burwell RD (2000) The parahippocampal region: corticocortical connectivity. *Ann N Y Acad Sci* 911: 25–42.
- Schmidtke K, Reinhardt M, Krause T (1998) Cerebral perfusion during transient global amnesia: findings with HMPAO SPECT. *J Nucl Med* 39: 155–159.
- Evans J, Wilson B, Wraight EP, Hodges JR (1993) Neuropsychological and SPECT scan findings during and after transient global amnesia: evidence for the differential impairment of remote episodic memory. *J Neurol Neurosurg Psychiatry* 56: 1227–1230.
- Goldenberg G, Podreka I, Pfaffelmeyer N, Wessely P, Deecke L (1991) Thalamic ischemia in transient global amnesia: a SPECT study. *Neurology* 41: 1748–1752.
- Jovini TG, Vittori RA, McCluskey LF (2000) Evolution of temporal lobe hypoperfusion in transient global amnesia: a serial single photon emission computed tomography study. *J Neuroimaging* 10: 238–241.
- Laloux P, Brichant C, Cauwe F, Decoster P (1992) Technetium-99m HM-PAO single photon emission computed tomography imaging in transient global amnesia. *Arch Neurol* 49: 543–546.
- Lin KN, Liu RS, Yeh TP, Wang SJ, Liu HC (1993) Posterior ischemia during an attack of transient global amnesia. *Stroke* 24: 1093–1095.
- Sakashita Y, Kanai M, Sugimoto T, Taki S, Takamori M (1997) Changes in cerebral blood flow and vasoreactivity in response to acetazolamide in patients with transient global amnesia. *J Neurol Neurosurg Psychiatry* 63: 605–610.
- Stillhard G, Landis T, Schiess R, Regard M, Sialer G (1990) Bitemporal hypoperfusion in transient global amnesia: 99m-Tc-HM-PAO SPECT and neuropsychological findings during and after an attack. *J Neurol Neurosurg Psychiatry* 53: 339–342.
- Takeuchi R, Yonekura Y, Matsuda H, Nishimura Y, Tanaka H, et al. (1998) Resting and acetazolamide-challenged technetium-99m-ECD SPECT in transient global amnesia. *J Nucl Med* 39: 1360–1362.
- Warren JD, Chatterton B, Thompson PD (2000) A SPECT study of the anatomy of transient global amnesia. *J Clin Neurosci* 7: 57–59.
- Yang Y, Kim JS, Kim S, Kim YK, Kwak YT, et al. (2009) Cerebellar Hypoperfusion during Transient Global Amnesia: An MRI and Oculographic Study. *J Clin Neurol* 5: 74–80.
- Kahn I, Andrews-Hanna JR, Vincent JL, Snyder AZ, Buckner RL (2008) Distinct cortical anatomy linked to subregions of the medial temporal lobe revealed by intrinsic functional connectivity. *J Neurophysiol* 100: 129–139.
- Libby LA, Ekstrom AD, Ragland JD, Ranganath C (2012) Differential Connectivity of Perirhinal and Parahippocampal Cortices within Human Hippocampal Subregions Revealed by High-Resolution Functional Imaging. *J Neurosci* 32: 6550–6560.
- Duvernoy HM (2005) The human hippocampus : functional anatomy, vascularization, and serial sections with MRI. Berlin; New York: Springer. viii, 232 p. p.
- Hodges JR, Warlow CP (1990) Syndromes of transient amnesia: towards a classification. A study of 153 cases. *J Neurol Neurosurg Psychiatry* 53: 834–843.
- Ryoo I, Kim JH, Kim S, Choi BS, Jung C, et al. (2012) Lesion detectability on diffusion-weighted imaging in transient global amnesia: the influence of imaging timing and magnetic field strength. *Neuroradiology* 54: 329–334.
- Friston KJ, Ashburner J, Frith CD, Poline JB, Heather JD, et al. (1995) Spatial registration and normalization of images. *Hum Brain Mapp* 3: 165–189.
- Quinette P, Guillery-Girard B, Dayan J, de la Sayette V, Marquis S, et al. (2006) What does transient global amnesia really mean? Review of the literature and thorough study of 142 cases. *Brain* 129: 1640–1658.
- Ward JH (1963) Hierarchical Grouping to Optimize an Objective Function. *J Am Stat Assoc* 58: 236–244.
- Escofier B, Pages J (1994) Multiple factor analysis (AFMULT package). *Comput Stat Data Anal* 18: 121–140.
- Meulman JJ, van der Kooij AJ, Heiser WJ (2004) Principal components analysis with nonlinear optimal scaling transformations for ordinal and nominal data. In: Kaplan D, editor. *Handbook of quantitative methodology for the social sciences*. Thousand Oaks, CA: Sage Publications.
- Lipsitz SR, Fitzmaurice G (1994) An extension of Yule's Q to multivariate binary data. *Biometrics* 50: 847–852.
- Sokal RR, Michener CD (1958) A statistical method for evaluating systematic relationships. *Univ Kansas Sci Bull* 38: 1409–1438.
- Cronbach LJ (1951) Coefficient alpha and the internal structure of tests. *Psychometrika* 16: 297–334.
- Suzuki WA, Amaral DG (1994) Perirhinal and parahippocampal cortices of the macaque monkey: cortical afferents. *J Comp Neurol* 350: 497–533.
- Suzuki WA, Amaral DG (1994) Topographic organization of the reciprocal connections between the monkey entorhinal cortex and the perirhinal and parahippocampal cortices. *J Neurosci* 14: 1856–1877.
- Naber PA, Lopes da Silva FH, Witter MP (2001) Reciprocal connections between the entorhinal cortex and hippocampal fields CA1 and the subiculum are in register with the projections from CA1 to the subiculum. *Hippocampus* 11: 99–104.
- Lepage M, Habib R, Tulving E (1998) Hippocampal PET activations of memory encoding and retrieval: the HIPER model. *Hippocampus* 8: 313–322.
- Schacter DL, Curran T, Reiman EM, Chen K, Bandy DJ, et al. (1999) Medial temporal lobe activation during episodic encoding and retrieval: a PET study. *Hippocampus* 9: 575–581.
- Winbeck K, Etgen T, von Einsiedel HG, Rottinger M, Sander D (2005) DWI in transient global amnesia and TIA: proposal for an ischaemic origin of TGA. *J Neurol Neurosurg Psychiatry* 76: 438–441.
- Agosti C, Borroni B, Akkawi NM, Padovani A (2010) Cerebrovascular risk factors and triggers in transient global amnesia patients with and without jugular valve incompetence: results from a sample of 243 patients. *Eur Neurol* 63: 291–294.
- Scharrer E (1940) Vascularization and vulnerability of the cornu ammonis in the opossum. *Arch Neurol Psychiatry* 44: 483–506.
- Matsuda H, Higashi S, Tsuji S, Sumiya H, Miyauchi T, et al. (1993) High resolution Tc-99m HMPAO SPECT in a patient with transient global amnesia. *Clin Nucl Med* 18: 46–49.
- Jung HH, Baumgartner RW, Burgunder JM, Wielepp JP, Lourens S (1996) Reversible hyperperfusion of the right medial temporal lobe in transient global amnesia. *J Neurol Neurosurg Psychiatry* 61: 654–655.
- Forman SD, Cohen JD, Fitzgerald M, Eddy WF, Mintun MA, et al. (1995) Improved assessment of significant activation in functional magnetic resonance imaging (fMRI): use of a cluster-size threshold. *Magn Reson Med* 33: 636–647.
