# Supplementary material for: Reflections of Two Parallel Pathways between the Hippocampus and Neocortex in Transient Global Amnesia: A Cross-Sectional Study Using DWI and SPECT
Source: PubMed Central journal article supplement (PMC3702497; doi:10.1371/journal.pone.0067447), 2013-07-05

**Figure S1. Areas of hypoperfusion in relation to the laterality of the hippocampal lesion.**

Perfusion deficits in patients with hippocampal lesions on left vs. right (A) and right vs. left (B) were shown. The hypoperfusion areas (red color) were displayed on rendering images at a threshold of  $P < 0.005$  uncorrected,  $k = 100$ .

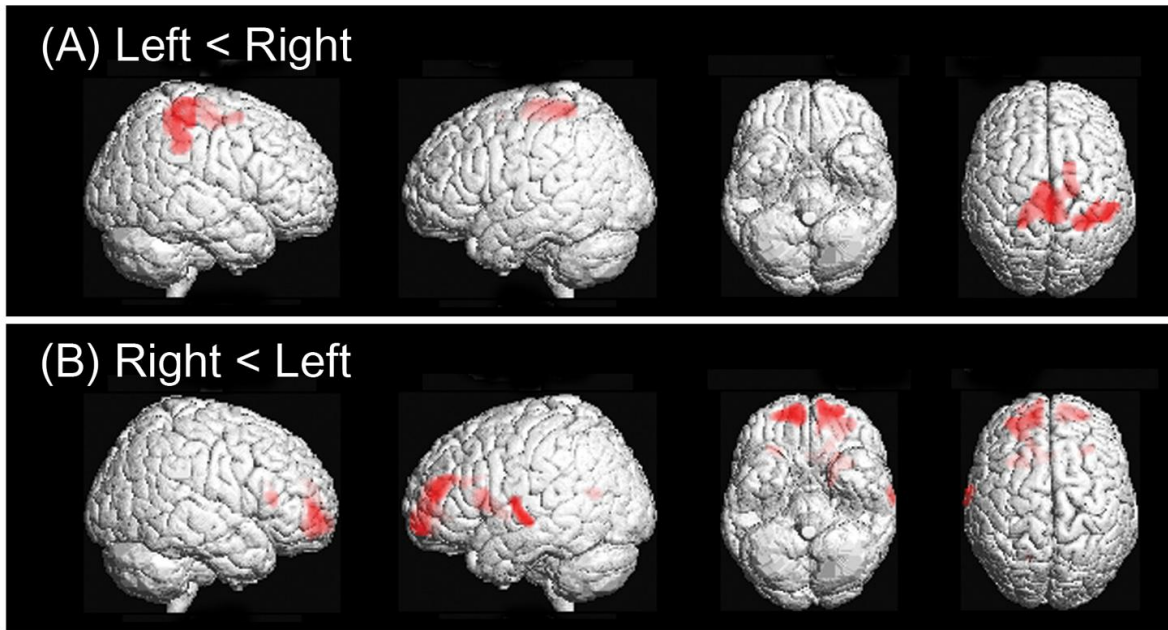

Supplement: pone.0067447.s001.pdf [file pone.0067447.s001.pdf]
